# Supplementary material for: High CD39 expression is associated with the non-muscle-invasive phenotype of human bladder cancer
Source: PubMed Central journal article supplement (PMC8351603; doi:10.18632/oncotarget.28029), 2021-08-03
Supplement: oncotarget-12-1580-s001.pdf [file oncotarget-12-1580-s001.pdf]

## High CD39 expression is associated with the non-muscle-invasive phenotype of human bladder cancer

### SUPPLEMENTARY MATERIALS

**Supplementary Table 1: Correlation of CD73 expression with clinicopathological parameters of 162 BC patients**

| Parameters   | No. of Patients | CD73     |                |                 | P Value |
|--------------|-----------------|----------|----------------|-----------------|---------|
|              |                 | Negative | Low expression | High expression |         |
| Gender       |                 |          |                |                 |         |
| Male         | 129             | 04 (03%) | 22 (17%)       | 103 (80%)       | 0.281   |
| Female       | 33              | 01 (03%) | 02 (06%)       | 30 (91%)        |         |
| Age          |                 |          |                |                 |         |
| ≤ 65         | 48              | 00 (00%) | 06 (13%)       | 42 (87%)        | 0.273   |
| > 65         | 114             | 05 (04%) | 18 (16%)       | 91 (80%)        |         |
| Smoking      |                 |          |                |                 |         |
| No           | 31              | 01 (03%) | 06 (19%)       | 24 (78%)        | 0.619   |
| Yes          | 120             | 04 (03%) | 15 (13%)       | 101 (84%)       |         |
| Unknown      | 11              | 00 (00%) | 03 (27%)       | 08 (73%)        |         |
| Grade        |                 |          |                |                 |         |
| Low          | 42              | 01 (02%) | 06 (14%)       | 35 (34%)        | 0.945   |
| High         | 120             | 04 (03%) | 18 (15%)       | 98 (82%)        |         |
| Tumor stage  |                 |          |                |                 |         |
| NMI          | 96              | 03 (03%) | 13 (14%)       | 80 (83%)        | 0.860   |
| MI           | 66              | 02 (03%) | 11 (17%)       | 53 (80%)        |         |
| Tumor stage  |                 |          |                |                 |         |
| pTa          | 71              | 03 (04%) | 09 (13%)       | 59 (83%)        | 0.612   |
| pT1          | 25              | 00 (00%) | 04 (16%)       | 21 (84%)        |         |
| pT2          | 21              | 01 (05%) | 04 (19%)       | 16 (76%)        |         |
| pT3          | 26              | 00 (00%) | 02 (19%)       | 24 (92%)        |         |
| pT4          | 19              | 01 (05%) | 05 (26%)       | 13 (69%)        |         |
| Treatment    |                 |          |                |                 |         |
| TUR          | 87              | 02 (02%) | 12 (14%)       | 73 (84%)        | 0.746   |
| Cystectomy   | 75              | 03 (04%) | 12 (16%)       | 60 (80%)        |         |
| Recurrence*  |                 |          |                |                 |         |
| No           | 37              | 01 (03%) | 05 (14%)       | 31 (84%)        | 0.976   |
| Yes          | 50              | 01 (02%) | 07 (14%)       | 42 (84%)        |         |
| Progression* |                 |          |                |                 |         |
| No           | 73              | 02 (03%) | 09 (12%)       | 62 (85%)        | 0.564   |
| Yes          | 14              | 00 (00%) | 03 (21%)       | 11 (79%)        |         |

\*Only patients who underwent transurethral resection (TUR).

**Supplementary Table 2: Correlation of different profiles of CD39 and CD73 expression with clinicopathological parameters of 162 BC patients**

| Parameters   | No. of Patients | CD39-CD73                               |                                          |                                          |                                           | P Value          |
|--------------|-----------------|-----------------------------------------|------------------------------------------|------------------------------------------|-------------------------------------------|------------------|
|              |                 | CD39 <sub>Low</sub> CD73 <sub>Low</sub> | CD39 <sub>High</sub> CD73 <sub>Low</sub> | CD39 <sub>Low</sub> CD73 <sub>High</sub> | CD39 <sub>High</sub> CD73 <sub>High</sub> |                  |
| Gender       |                 |                                         |                                          |                                          |                                           |                  |
| Male         | 129             | 30 (23%)                                | 28 (22%)                                 | 24 (19%)                                 | 47 (36%)                                  | 0.457            |
| Female       | 33              | 06 (18%)                                | 04 (12%)                                 | 07 (21%)                                 | 16 (49%)                                  |                  |
| Age          |                 |                                         |                                          |                                          |                                           |                  |
| ≤ 65         | 48              | 09 (19%)                                | 11 (23%)                                 | 10 (21%)                                 | 18 (38%)                                  | 0.837            |
| > 65         | 114             | 27 (24%)                                | 21 (18%)                                 | 21 (18%)                                 | 45 (40%)                                  |                  |
| Smoking      |                 |                                         |                                          |                                          |                                           |                  |
| No           | 31              | 06 (19%)                                | 12 (39%)                                 | 02 (07%)                                 | 11 (36%)                                  | <b>0.007</b>     |
| Yes          | 120             | 25 (21%)                                | 19 (16%)                                 | 25 (21%)                                 | 51 (43%)                                  |                  |
| Unknown      | 11              | 05 (46%)                                | 01 (09%)                                 | 04 (36%)                                 | 01 (09%)                                  |                  |
| Grade        |                 |                                         |                                          |                                          |                                           |                  |
| Low          | 42              | 08 (19%)                                | 12 (29%)                                 | 05 (12%)                                 | 17 (41%)                                  | 0.253            |
| High         | 120             | 28 (23%)                                | 20 (17%)                                 | 26 (22%)                                 | 46 (38%)                                  |                  |
| Tumor stage  |                 |                                         |                                          |                                          |                                           |                  |
| NMI          | 96              | 15 (16%)                                | 26 (27%)                                 | 08 (08%)                                 | 47 (49%)                                  | <b>&lt;0.001</b> |
| MI           | 66              | 21 (32%)                                | 06 (09%)                                 | 23 (35%)                                 | 16 (24%)                                  |                  |
| Tumor stage  |                 |                                         |                                          |                                          |                                           |                  |
| pTa          | 71              | 12 (17%)                                | 22 (31%)                                 | 05 (07%)                                 | 32 (45%)                                  | <b>&lt;0.001</b> |
| pT1          | 25              | 03 (12%)                                | 04 (16%)                                 | 03 (12%)                                 | 15 (60%)                                  |                  |
| pT2          | 21              | 09 (43%)                                | 02 (09%)                                 | 05 (24%)                                 | 05 (24%)                                  |                  |
| pT3          | 26              | 07 (27%)                                | 01 (04%)                                 | 10 (39%)                                 | 08 (31%)                                  |                  |
| pT4          | 19              | 05 (26%)                                | 03 (16%)                                 | 08 (42%)                                 | 03 (16%)                                  |                  |
| Treatment    |                 |                                         |                                          |                                          |                                           |                  |
| TUR          | 87              | 12 (14%)                                | 26 (30%)                                 | 06 (07%)                                 | 43 (49%)                                  | <b>&lt;0.001</b> |
| Cystectomy   | 75              | 24 (32%)                                | 06 (08%)                                 | 25 (33%)                                 | 20 (27%)                                  |                  |
| Recurrence*  |                 |                                         |                                          |                                          |                                           |                  |
| No           | 37              | 08 (22%)                                | 09 (24%)                                 | 02 (05%)                                 | 18 (49%)                                  | 0.291            |
| Yes          | 50              | 04 (08%)                                | 17 (34%)                                 | 04 (08%)                                 | 25 (50%)                                  |                  |
| Progression* |                 |                                         |                                          |                                          |                                           |                  |
| No           | 73              | 11 (15%)                                | 21 (29%)                                 | 05 (07%)                                 | 36 (49%)                                  | 0.867            |
| Yes          | 14              | 01 (07%)                                | 05 (36%)                                 | 01 (07%)                                 | 07 (50%)                                  |                  |

\*Only patients who underwent transurethral resection (TUR).
